# Supplementary material for: Genome Size in the Arenaria ciliata Species Complex (Caryophyllaceae), with Special Focus on A. ciliata subsp. bernensis, a Narrow Endemic of the Swiss Northern Alps
Source: MDPI journal article supplement (doi:10.3390/plants11243489), 2022-12-13
Supplement: s1 [file s1]

## Supplementary Materials

**Table S1.** Characterization of all collected taxa and samples from the *Arenaria ciliata* species complex, with the corresponding genome sizes (2c values in pg of DNA). Irregular floral morphology: \* plants with 6 petals, \*\* plants with 9 petals. x- and y- coordinates indicate the National Swiss Geographic Mapping reference.

| Taxon                                        | Date       | x-<br>Coordinates | y-<br>Coordinates | Region / Summit                | Elevation<br>(m a.s.l.) | 2c (pg) |
|----------------------------------------------|------------|-------------------|-------------------|--------------------------------|-------------------------|---------|
| <i>A. ciliata</i> subsp. <i>bernensis</i>    | 19.08.2022 | 2567765           | 1155653           | Moléson                        | 1920                    | 6.74    |
| <i>A. ciliata</i> subsp. <i>bernensis</i>    | 19.08.2022 | 2567765           | 1155653           | Moléson                        | 1920                    | 6.62    |
| <i>A. ciliata</i> subsp. <i>bernensis</i>    | 19.08.2022 | 2567744           | 1155684           | Moléson                        | 1840                    | 6.34    |
| <i>A. ciliata</i> subsp. <i>bernensis</i>    | 19.08.2022 | 2567744           | 1155684           | Moléson                        | 1840                    | 6.26    |
| <i>A. ciliata</i> subsp. <i>bernensis</i>    | 19.08.2022 | 2567744           | 1155684           | Moléson                        | 1840                    | 6.53    |
| <i>A. ciliata</i> subsp. <i>bernensis</i>    | 05.08.2022 | 2577300           | 1152381           | Vanil Noir / Vanil de l'Ecri   | 2365                    | 6.42    |
| <i>A. ciliata</i> subsp. <i>bernensis</i>    | 30.08.2022 | 2578797           | 1154815           | Vanil Noir / Galère            | 2100                    | 6.40    |
| <i>A. ciliata</i> subsp. <i>bernensis</i>    | 30.08.2022 | 2578495           | 1154467           | Vanil Noir / Galère            | 2100                    | 6.65    |
| <i>A. ciliata</i> subsp. <i>bernensis</i>    | 30.08.2022 | 2577920           | 1154018           | Vanil Noir / Galère            | 2100                    | 6.74    |
| <i>A. ciliata</i> subsp. <i>bernensis</i>    | 30.08.2022 | 2578859           | 1154868           | Vanil Noir / Galère            | 2100                    | 6.99    |
| <i>A. ciliata</i> subsp. <i>bernensis</i>    | 30.08.2022 | 2578893           | 1154981           | Vanil Noir / Galère            | 2100                    | 6.65    |
| <i>A. ciliata</i> subsp. <i>bernensis</i>    | 30.08.2022 | 2578163           | 1154140           | Vanil Noir / Galère            | 2100                    | 6.45    |
| <i>A. ciliata</i> subsp. <i>bernensis</i>    | 30.08.2022 | 2578091           | 1154111           | Vanil Noir / Galère            | 2100                    | 6.89    |
| <i>A. ciliata</i> subsp. <i>bernensis</i>    | 05.08.2022 | 2579688           | 1155723           | Vanil Noir / Dent de Brenleire | 2100                    | 7.33    |
| <i>A. ciliata</i> subsp. <i>bernensis</i>    | 17.08.2022 | 2579688           | 1155723           | Vanil Noir / Dent de Brenleire | 2300                    | 6.56    |
| <i>A. ciliata</i> subsp. <i>bernensis</i>    | 17.08.2022 | 2579680           | 1155729           | Vanil Noir / Dent de Brenleire | 2300                    | 6.77    |
| <i>A. ciliata</i> subsp. <i>bernensis</i>    | 17.08.2022 | 2579731           | 1155635           | Vanil Noir / Dent de Brenleire | 2300                    | 6.80    |
| <i>A. ciliata</i> subsp. <i>bernensis</i>    | 17.08.2022 | 2579675           | 1155733           | Vanil Noir / Dent de Brenleire | 2300                    | 7.02    |
| <i>A. ciliata</i> subsp. <i>bernensis</i>    | 15.08.2022 | 2580095           | 1154148           | Vanil Noir / Dzori Marro       | 1800                    | 7.16    |
| <i>A. ciliata</i> subsp. <i>bernensis</i>    | 21.08.2022 | 2585594           | 1163489           | Schopfenspitz                  | 2090                    | 6.89    |
| <i>A. ciliata</i> subsp. <i>bernensis</i>    | 21.08.2022 | 2585594           | 1163489           | Schopfenspitz                  | 2090                    | 7.09    |
| <i>A. ciliata</i> subsp. <i>bernensis</i>    | 21.08.2022 | 2585594           | 1163489           | Schopfenspitz                  | 2090                    | 7.02    |
| <i>A. ciliata</i> subsp. <i>bernensis</i>    | 21.08.2022 | 2585573           | 1163458           | Schopfenspitz                  | 2080                    | 6.99    |
| <i>A. ciliata</i> subsp. <i>bernensis</i>    | 21.08.2022 | 2585573           | 1163458           | Schopfenspitz                  | 2080                    | 6.96    |
| <i>A. ciliata</i> subsp. <i>bernensis</i>    | 28.08.2022 | 2590513           | 1166413           | Kaiseregg / Kaisereggpass      | 2090                    | 6.93    |
| <i>A. ciliata</i> subsp. <i>bernensis</i>    | 28.08.2022 | 2590513           | 1166413           | Kaiseregg / Kaisereggpass      | 2090                    | 6.80    |
| <i>A. ciliata</i> subsp. <i>bernensis</i>    | 28.08.2022 | 2590513           | 1166413           | Kaiseregg / Kaisereggpass      | 2090                    | 6.83    |
| <i>A. ciliata</i> subsp. <i>bernensis</i>    | 28.08.2022 | 2590535           | 1166783           | Kaiseregg / Kaisereggpass      | 2070                    | 6.93    |
| <i>A. ciliata</i> subsp. <i>bernensis</i>    | 28.08.2022 | 2590769           | 1166752           | Kaiseregg                      | 2170                    | 6.56    |
| <i>A. ciliata</i> subsp. <i>bernensis</i>    | 28.08.2022 | 2590769           | 1166752           | Kaiseregg                      | 2170                    | 6.45    |
| <i>A. ciliata</i> subsp. <i>bernensis</i>    | 28.08.2022 | 2590769           | 1166752           | Kaiseregg                      | 2170                    | 6.65    |
| <i>A. ciliata</i> subsp. <i>bernensis</i>    | 28.08.2022 | 2590769           | 1166752           | Kaiseregg                      | 2170                    | 6.71    |
| <i>A. ciliata</i> subsp. <i>bernensis</i>    | 28.08.2022 | 2590769           | 1166752           | Kaiseregg                      | 2170                    | 6.74    |
| <i>A. ciliata</i> subsp. <i>bernensis</i>    | 05.08.2022 | 2601038           | 1172674           | Gantrisch                      | 2110                    | 7.19    |
| <i>A. ciliata</i> subsp. <i>bernensis</i>    | 05.08.2022 | 2601038           | 1172674           | Gantrisch                      | 2110                    | 6.71    |
| <i>A. ciliata</i> subsp. <i>bernensis</i>    | 05.08.2022 | 2601038           | 1172674           | Gantrisch                      | 2110                    | 6.89    |
| <i>A. ciliata</i> subsp. <i>bernensis</i>    | 05.08.2022 | 2601102           | 1172674           | Gantrisch                      | 2140                    | 7.16    |
| <i>A. ciliata</i> subsp. <i>bernensis</i>    | 05.08.2022 | 2601102           | 1172674           | Gantrisch                      | 2140                    | 7.19    |
| <i>A. ciliata</i> subsp. <i>bernensis</i> ** | 05.08.2022 | 2601102           | 1172674           | Gantrisch                      | 2140                    | 6.83    |
| <i>A. ciliata</i> subsp. <i>bernensis</i>    | 05.08.2022 | 2601400           | 1172581           | Gantrisch / Leiterenpass       | 1940                    | 6.88    |
| <i>A. ciliata</i> subsp. <i>bernensis</i>    | 05.08.2022 | 2601400           | 1172581           | Gantrisch / Leiterenpass       | 1940                    | 6.96    |
| <i>A. ciliata</i> subsp. <i>bernensis</i>    | 05.08.2022 | 2601400           | 1172581           | Gantrisch / Leiterenpass       | 1940                    | 7.09    |
| <i>A. ciliata</i> subsp. <i>bernensis</i>    | 05.08.2022 | 2601400           | 1172581           | Gantrisch / Leiterenpass       | 1940                    | 6.80    |
| <i>A. ciliata</i> subsp. <i>bernensis</i>    | 05.08.2022 | 2601400           | 1172581           | Gantrisch / Leiterenpass       | 1940                    | 7.16    |
| <i>A. ciliata</i> subsp. <i>bernensis</i>    | 05.08.2022 | 2601400           | 1172581           | Gantrisch / Leiterenpass       | 1940                    | 6.99    |
| <i>A. ciliata</i> subsp. <i>bernensis</i>    | 05.08.2022 | 2601400           | 1172581           | Gantrisch / Leiterenpass       | 1940                    | 6.80    |

|                                             |            |         |         |                            |      |      |
|---------------------------------------------|------------|---------|---------|----------------------------|------|------|
| <i>A. ciliata</i> subsp. <i>bernensis</i>   | 05.08.2022 | 2601400 | 1172581 | Gantrisch / Leiterenpass   | 1940 | 7.09 |
| <i>A. ciliata</i> subsp. <i>bernensis</i>   | 05.08.2022 | 2601400 | 1172581 | Gantrisch / Leiterenpass   | 1940 | 7.26 |
| <i>A. ciliata</i> subsp. <i>bernensis</i>   | 05.08.2022 | 2601400 | 1172581 | Gantrisch / Leiterenpass   | 1940 | 7.09 |
| <i>A. ciliata</i> subsp. <i>bernensis</i>   | 12.08.2022 | 2607498 | 1171412 | Stockhorn                  | 2110 | 7.75 |
| <i>A. ciliata</i> subsp. <i>bernensis</i>   | 12.08.2022 | 2607498 | 1171412 | Stockhorn                  | 2110 | 7.09 |
| <i>A. ciliata</i> subsp. <i>bernensis</i>   | 12.08.2022 | 2607498 | 1171412 | Stockhorn                  | 2110 | 7.48 |
| <i>A. ciliata</i> subsp. <i>bernensis</i>   | 12.08.2022 | 2607498 | 1171412 | Stockhorn                  | 2110 | 6.99 |
| <i>A. ciliata</i> subsp. <i>bernensis</i>   | 12.08.2022 | 2607498 | 1171412 | Stockhorn                  | 2110 | 7.78 |
| <i>A. ciliata</i> subsp. <i>bernensis</i> * | 12.08.2022 | 2607498 | 1171412 | Stockhorn                  | 2110 | 7.75 |
| <i>A. ciliata</i> subsp. <i>bernensis</i> * | 12.08.2022 | 2607498 | 1171412 | Stockhorn                  | 2110 | 6.80 |
| <i>A. ciliata</i> subsp. <i>bernensis</i> * | 12.08.2022 | 2607498 | 1171412 | Stockhorn                  | 2110 | 7.37 |
| <i>A. ciliata</i> subsp. <i>ciliata</i>     | 05.08.2022 | 2567646 | 1155404 | Molésón                    | 1980 | 1.80 |
| <i>A. ciliata</i> subsp. <i>ciliata</i>     | 05.08.2022 | 2567646 | 1155404 | Molésón                    | 1980 | 1.70 |
| <i>A. ciliata</i> subsp. <i>ciliata</i>     | 05.08.2022 | 2567646 | 1155404 | Molésón                    | 1980 | 1.65 |
| <i>A. ciliata</i> subsp. <i>ciliata</i>     | 10.08.2022 | 2576024 | 1150337 | Vanil Noir / Gros Perré    | 2150 | 1.69 |
| <i>A. ciliata</i> subsp. <i>ciliata</i>     | 10.08.2022 | 2576024 | 1150337 | Vanil Noir / Gros Perré    | 2150 | 1.69 |
| <i>A. gothica</i>                           | 01.10.2022 | 2510831 | 1165911 | Lac de Joux (ex situ BGFR) | 1004 | 3.60 |
| <i>A. gothica</i>                           | 01.10.2022 | 2510831 | 1165911 | Lac de Joux (ex situ BGFR) | 1004 | 3.79 |
| <i>A. gothica</i>                           | 01.10.2022 | 2510831 | 1165911 | Lac de Joux (ex situ BGFR) | 1004 | 3.74 |
| <i>A. gothica</i>                           | 01.10.2022 | 2510831 | 1165911 | Lac de Joux (ex situ BGFR) | 1004 | 3.62 |
| <i>A. gothica</i>                           | 01.10.2022 | 2510831 | 1165911 | Lac de Joux (ex situ BGFR) | 1004 | 3.75 |
| <i>A. gothica</i>                           | 01.10.2022 | 2510831 | 1165911 | Lac de Joux (ex situ BGFR) | 1004 | 3.77 |
| <i>A. gothica</i>                           | 01.10.2022 | 2510831 | 1165911 | Lac de Joux (ex situ BGFR) | 1004 | 3.63 |
| <i>A. gothica</i>                           | 01.10.2022 | 2510831 | 1165911 | Lac de Joux (ex situ BGFR) | 1004 | 3.74 |
| <i>A. gothica</i>                           | 01.10.2022 | 2510831 | 1165911 | Lac de Joux (ex situ BGFR) | 1004 | 3.60 |
| <i>A. gothica</i>                           | 01.10.2022 | 2510831 | 1165911 | Lac de Joux (ex situ BGFR) | 1004 | 3.66 |
| <i>A. multicaulis</i>                       | 30.08.2022 | 2578601 | 1154553 | Vanil Noir / Galère        | 2100 | 1.53 |
| <i>A. multicaulis</i>                       | 05.08.2022 | 2601038 | 1172519 | Gantrisch                  | 2020 | 1.60 |
| <i>A. multicaulis</i>                       | 05.08.2022 | 2601038 | 1172519 | Gantrisch                  | 2020 | 1.58 |
| <i>A. multicaulis</i>                       | 05.08.2022 | 2601038 | 1172519 | Gantrisch                  | 2020 | 1.63 |
| <i>A. multicaulis</i>                       | 05.08.2022 | 2601038 | 1172519 | Gantrisch                  | 2020 | 1.53 |

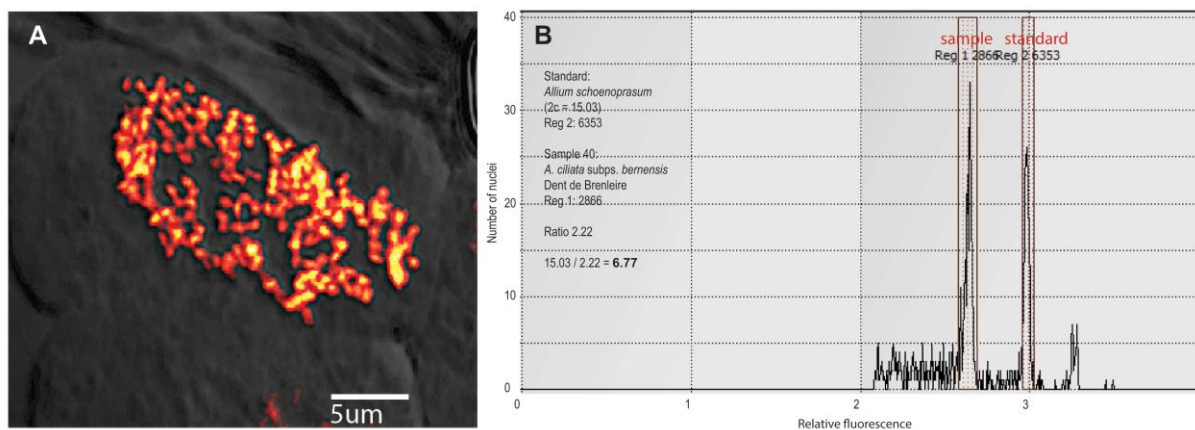

**Figure S1. A** – Confocal micrograph image of Fuelgen-stained late metaphase chromosomes in *Arenaria ciliata* subsp. *bernensis* from Dent de Brenleire (2n = 200, Fribourg, Switzerland). Image scale 1000x. **B** – Genome size estimation for *A. ciliata* subsp. *bernensis* from Dent de Brenleire using flow cytometry (for more details see Materials and Methods).
